# Supplementary material
Source: Springer Nature journal article supplement (https://www.springermedizin.de/resource/supplementary/12933_2002_3_MOESM7_ESM.pdf/9538100)

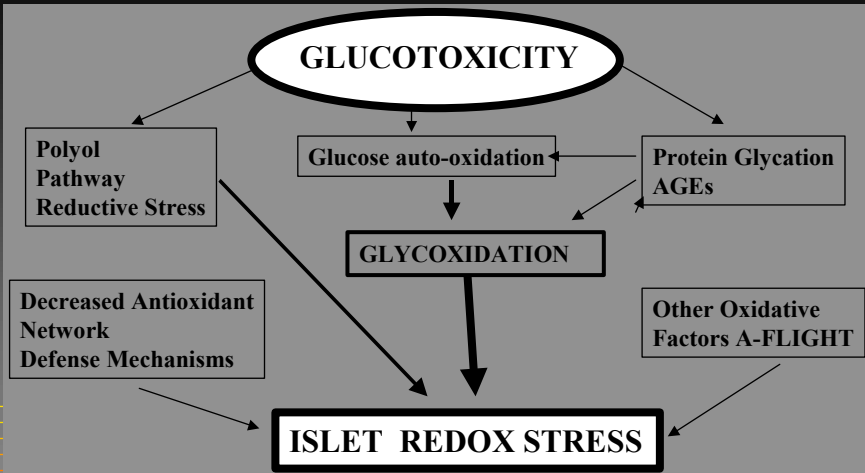

**Redox Stress Injury to the vulnerable Intima of the Arterial Vessel Wall.**

Supplement: MOESM7 [file 9538100]
